# Supplementary material for: ‘Waiting at the dinner table for scraps’: a qualitative study of the help-seeking experiences of heterosexual men living with HIV infection
Source: PubMed Central journal article supplement — BMJ Open. 2012 Jul 17;2(4):e000697. doi: 10.1136/bmjopen-2011-000697 (PMC3401825; doi:10.1136/bmjopen-2011-000697), 2012-07-17
Supplement: bmjopen-2011-000697-s2.pdf [file bmjopen-2011-000697-s2.pdf]

COREQ checklist

|                                                           |                                                                       |
|-----------------------------------------------------------|-----------------------------------------------------------------------|
| <b>Domain 1: Research team and reflexivity</b>            |                                                                       |
| Interviewer/facilitator                                   | Yes (page 8)                                                          |
| Credentials                                               | On cover page                                                         |
| Occupation                                                | On cover page                                                         |
| Gender                                                    | Male (pg. 8, 16, 30)                                                  |
| Experience/training                                       | On cover page                                                         |
| Relationship to participants prior to study commencement? | No, but not mentioned in text                                         |
| Participant knowledge of interviewer                      | No, not in text.                                                      |
| Interviewer characteristics                               | Gender and impact on data (pgs. 16, 30)                               |
| <b>Domain 2: Study Design</b>                             |                                                                       |
| Methodological orientation                                | Yes. Theory provided in appendix, and orientation/approach on page 9. |
| Sampling                                                  | Purposive, theoretical (page 7-9)                                     |
| Method of approach                                        | With AIDS service organizations (p. 7)                                |
| Sample size                                               | 8 focus groups, 40 participants                                       |
| Non-participation                                         | N/A                                                                   |
| Setting of data collection                                | p. 8                                                                  |
| Presence of non-participants                              | No, not mentioned in text.                                            |
| Description of sample                                     | Demographics in Table 1.                                              |
| Interview guide                                           | Prompted by TA, developed with community advisory board (p. 8)        |
| Repeat interviews                                         | No                                                                    |
| Audio/visual recording                                    | No                                                                    |
| Field notes                                               | p. 9                                                                  |
| Duration                                                  | p. 9                                                                  |
| Data saturation                                           | Approach to analysis on p. 9-10                                       |
| Transcripts returned                                      | N/A                                                                   |
| <b>Domain 3: Analysis and Findings</b>                    |                                                                       |
| Number of data coders                                     | Mostly by TA with extensive input/review by team.                     |
| Description of the coding tree                            | No                                                                    |
| Derivation of themes                                      | From data (p. 9-10)                                                   |
| Software                                                  | Used Microsoft word to manage data (p. 10)                            |
| Participant checking                                      | N/A                                                                   |
| Quotations presented                                      | For readers to discern                                                |
| Items 30-32                                               |                                                                       |
